# Supplementary material
Source: Elsevier journal article supplement (https://www.sciencedirect.com/science/article/pii/S1138359321000538)
Supplement: mmc1 [file S1138359321000538:mmc1.doc]

**ANEXO: ENCUESTA:**

**CONOCIMIENTO DE LA TROMBOPROFILAXIS Y COVID-19 ¿Tenemos presente esta relación en nuestra práctica clínica?**

**CONSENTIMIENTO:** Comprendo que mi participación es voluntaria y puedo retirarme de la encuesta cuando quiera y si lo solicito se eliminará de la base de datos la información suministrada sin que ello tenga ninguna repercusión en mi persona.

-Estoy de acuerdo

-No estoy de acuerdo

**CONFIDENCIALIDAD:** Comprendo que todos los datos obtenidos son confidenciales y solo se analizarán en un formato agregado (datos conjuntos y nunca individuales). Así mismo se guardarán de manera segura y solo las personas responsables tendrán acceso a ellos. Los datos recogidos no se compartirán a terceros.

-Estoy de acuerdo

-No estoy de acuerdo

He leído la información que se me ha enviado, he podido hacer preguntas sobre el estudio y he recibido suficiente información sobre el mismo.

-Estoy de acuerdo

-No estoy de acuerdo

1-Habitualmente ¿Evalúas el riesgo trombótico de los pacientes COVID-19?

-Si

-No

2.- ¿Consideras que los pacientes COVID-19 presentan mayor riesgo de sufrir enfermedad tromboembólica venosa (ETEV) y microtrombosis arteriales periféricas?

-Si

-No

-No sé/no contesto

3.- .¿Conoces algún protocolo para evaluar el riesgo trombótico en COVID-19?

-Si

-No

4.-¿Crees que la ETEV está infradiagnosticada en los pacientes COVID-19?

-Si

-No

-No sé/no contesto

5.- La aparición de fenómenos trombóticos ¿Se podría considerar como una manifestación más de sospecha de COVID-19?:

-Si

-No

-No sé/no contesto

6.- ¿Qué antecedentes crees que pueden influir en el riesgo tromboembólico de pacientes COVID-19? (puedes escoger más de una opción)

-Cirugía reciente

-Comorbilidad asociada (HTA, DM, ICC, neoplasias, obesidad, enfermedad venosa crónica, etc.)

-Embarazo y puerperio

-Trombofilia y otras alteraciones de la coagulación

-Edad

-Enfermedad aguda (infecciones, deshidratación, traumatismo reciente, etc.)

-Uso de anticonceptivos o tratamiento hormonal sustitutivo

-Inmovilización

7. ¿Qué condicionantes asociados al COVID-19 pueden suponer un mayor riesgo tromboembólico? (puedes escoger más de una opción)

-Inmovilización secundaria a mialgias o empeoramiento del malestar general

-Deshidratación secundaria a proceso gastrointestinal agudo

-Comorbilidad cardíaca (hipertensión arterial, insuficiencia cardíaca, etc.)

-Procesos neurológicos

-Otra

8-. ¿Los pacientes COVID-19 de manejo ambulatorio deberían recibir tromboprofilaxis?

-Si

-No

-Según escalas de riesgo trombótico y hemorrágico

9.- ¿Se recomienda el uso de la tromboprofilaxis farmacológica en pacientes COVID-19 que requieran ingreso hospitalario, si no hay contraindicaciones para su uso?

-Si

-No

-Según escalas de riesgo trombótico y hemorrágico

10.- ¿Se recomienda el uso de la tromboprofilaxis farmacológica en pacientes COVID-19 al alta hospitalaria, si no hay contraindicaciones para su uso?

-Si

-No

-Según escalas de riesgo trombótico y hemorrágico

11.- En caso de recibir tromboprofilaxis de ETEV en pacientes COVID-19 ¿Qué utilizarías?: (Puedes escoger más de una opción)

-Heparina de bajo peso molecular (HBPM)

-Heparina no fraccionada (HNF)

-Fondaparinux

-Acido acetilsalicílico (AAS)

-Antagonistas de la vitamina K (AVK)

-Anticoagulantes no vitamina K

-Medidas higiénicas dietéticas

12.- En los pacientes COVID-19 que se inicia tromboprofilaxis ¿Durante cuánto tiempo se mantendría? (puedes escoger más de una opción)

-Durante proceso agudo en domicilio

-Durante los 7-14 días posteriores al alta en caso de ingreso

-Durante los 7-14 días posteriores al alta en caso de ingreso si persistencia de alto riesgo trombótico

-No sé/no contesto

DATOS DEMOGRAFICOS

Edad

24-34 años

35-45 años

46-55 años

56-65 años

Mayor a 65 años

Sexo

Hombre

Mujer

Localidad de su centro asistencial

Rural (<10,000 habitantes)

Semi-urbano (10,000- 15,000 habitantes)

Urbano (>15,000 habitantes)

Ámbito de labor asistencial

Pública

Privada

Ambas

Años de experiencia laboral

1-5 años

6-10 años

11-20 años

21-30 años

Mayor a 31 años

¿Qué categoría profesional tienes?

Anestesiología y reanimación

Angiología

Cardiología

Hematología

Medicina Familiar y Comunitaria

Medicina Intensiva

Medicina Interna

Médico Interno Residente

Neumología

Neurología

Urgencias y Emergencias

Otra

Comunidad autónoma que trabajas

Andalucía

Aragón

Baleares

Canarias

Cantabria

Castilla La Mancha

Castilla y León

Cataluña

Comunidad de Madrid

Comunidad Foral de Navarra

Comunidad Valenciana

Ceuta y Melilla

Extremadura

Galicia

Murcia

País Vasco

Principado de Asturias

Rioja

Otra

¡Gracias por su colaboración! Por favor se ruega no volver a realizar la encuesta si ya la ha enviado con éxito para evitar sesgo.

Si necesita usted algún comentario, puedes realizarlo más abajo.
